# Supplementary material
Source: PubMed Central journal article supplement (PMC4512540)
Supplement: supp_115.177303_FigureS1.pdf [file supp_115.177303_FigureS1.pdf]

## Supplementary Figures

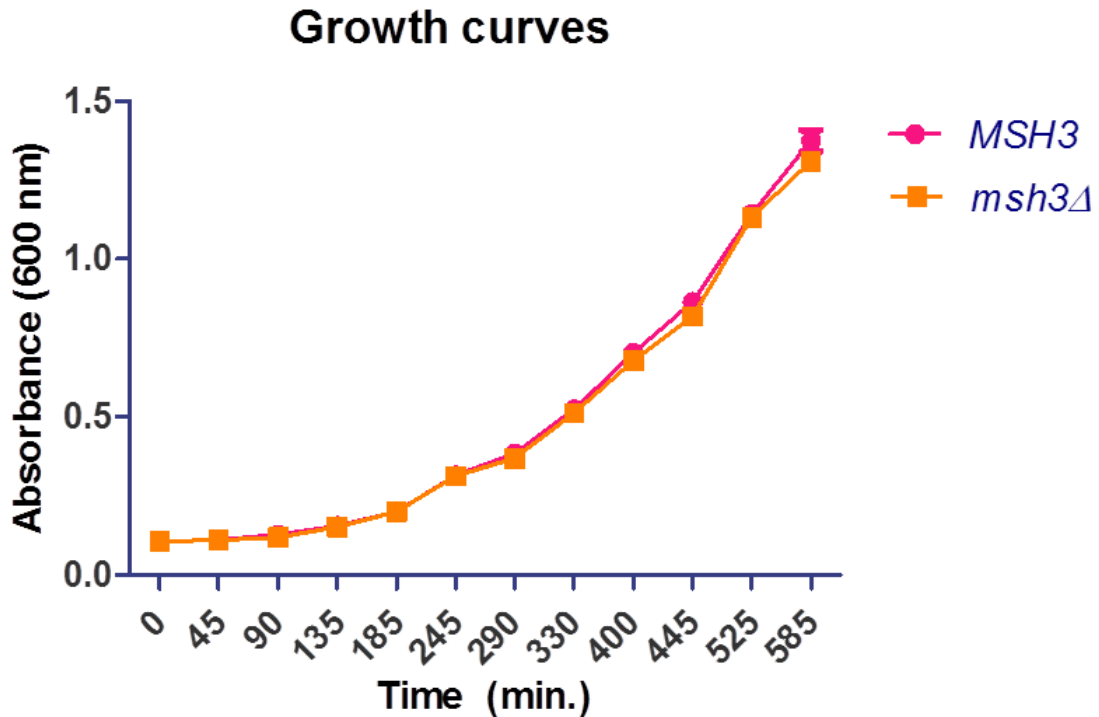

**Figure S1. Growth curves of *MSH3* and *msh3Δ* strains.** Growth curve experiments were performed with two independent isolates each of *MSH3(CTG)<sub>25</sub>* and *MSH3(CAG)<sub>25</sub>*, in parallel, measuring absorbance (600 nm) as a function of time. These curves were averaged and the standard error of the mean (S.E.M.) calculated for each time point (pink circles). Similarly, growth curve experiments were performed with two independent isolates each of *msh3Δ(CTG)<sub>25</sub>* and *msh3Δ(CAG)<sub>25</sub>* (orange squares).
