# Supplementary material
Source: PubMed Central journal article supplement (PMC4512540)
Supplement: supp_115.177303_FigureS2.pdf [file supp_115.177303_FigureS2.pdf]

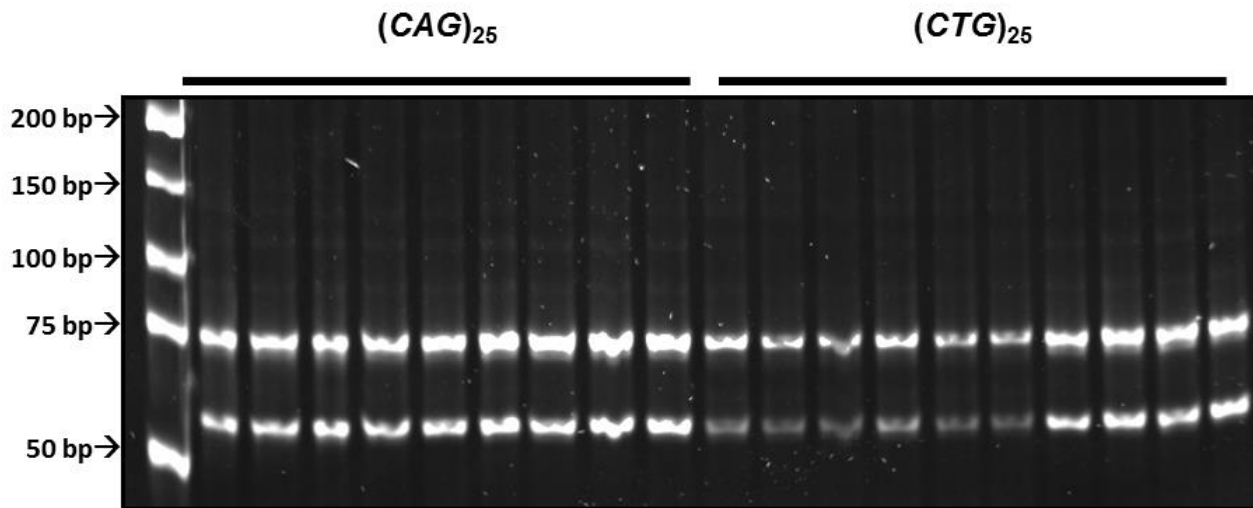

**Figure S2. Control PCR reactions to amplify unexpanded TNR tract from plasmid.**

Nineteen independent PCR amplification of the TNR tract from pBL170  $(CAG)_{25}$  and pBL169  $(CTG)_{25}$  (Miret *et al.*, 1998) separated by native gel electrophoresis on a 12% polyacrylamide gel. The PCR products were digested with *SphI* and *AflII*, which releases a product containing only the tract. The lower band is a product of this digestion. The unexpanded tract is 75 bp (25 repeats).
