# Supplementary material
Source: PubMed Central journal article supplement (PMC4512540)
Supplement: supp_115.177303_FigureS3.pdf [file supp_115.177303_FigureS3.pdf]

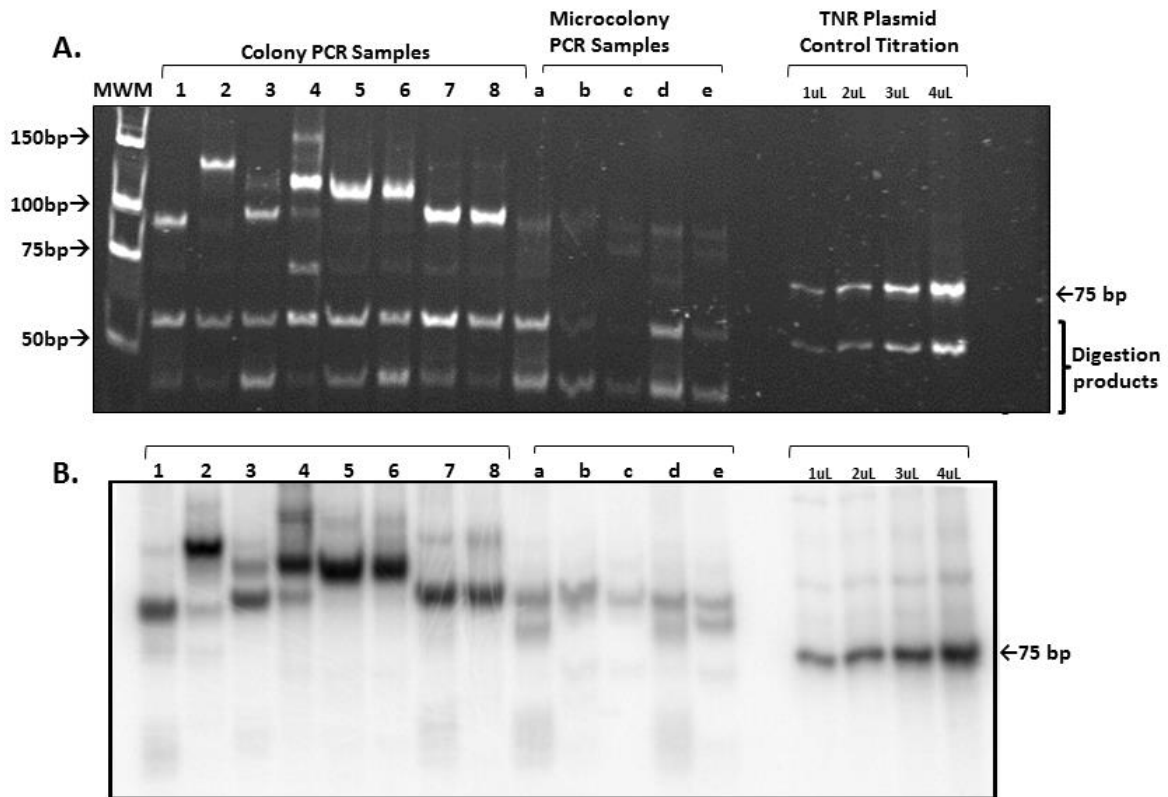

**Figure S3. Specificity of probe used for Southern blots.** The TNR tract from *MSH3* was amplified by PCR from representative colonies and microcolonies and digested with *SphI* and *AflI* to release the TNR tract. **A.** The resulting products were separated on a 12% polyacrylamide gel. A titration of a control reaction using plasmid DNA as a template was electrophoresed alongside these reactions (1 $\mu$ L – 4 $\mu$ L). **B.** The gel in **A** was subjected to Southern blot using a (CTG)-containing probe. The TNR probe specifically interacted with TNR-containing fragments, but not other DNA products.
