# Supplementary material
Source: PubMed Central journal article supplement (PMC4512540)
Supplement: supp_115.177303_FigureS4.pdf [file supp_115.177303_FigureS4.pdf]

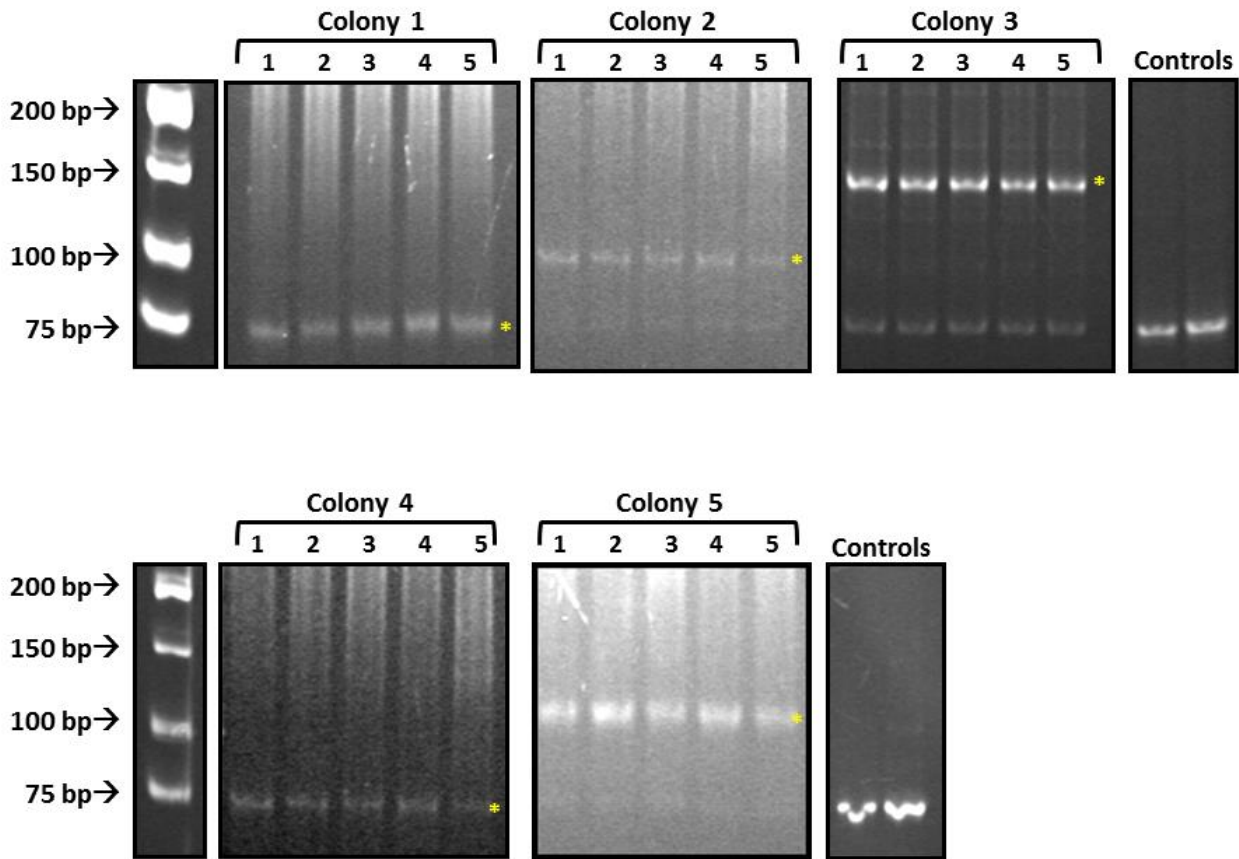

**Figure S4. Control colony PCR amplification of unexpanded and expanded TNR tracts.**

In each panel, five independent PCR reactions were performed in parallel from a single colony selected on 5-FOA to determine reproducibility of these reactions. PCR products were digested with *SphI* and *AflI* to release the tract. The other digestion products are not shown. The unexpanded tract is 75 bp.
