# Supplementary material
Source: PubMed Central journal article supplement (PMC4512540)
Supplement: supp_115.177303_FigureS5.pdf [file supp_115.177303_FigureS5.pdf]

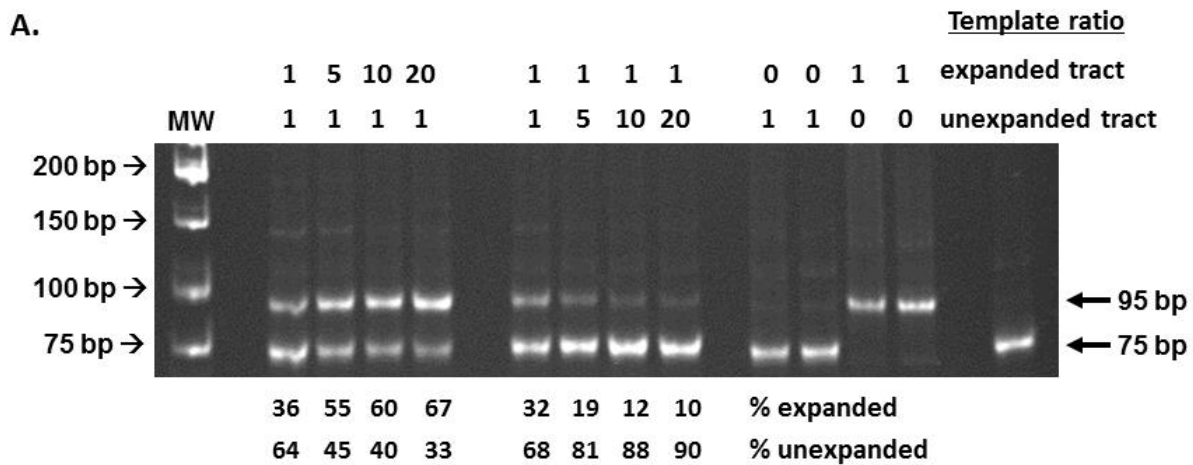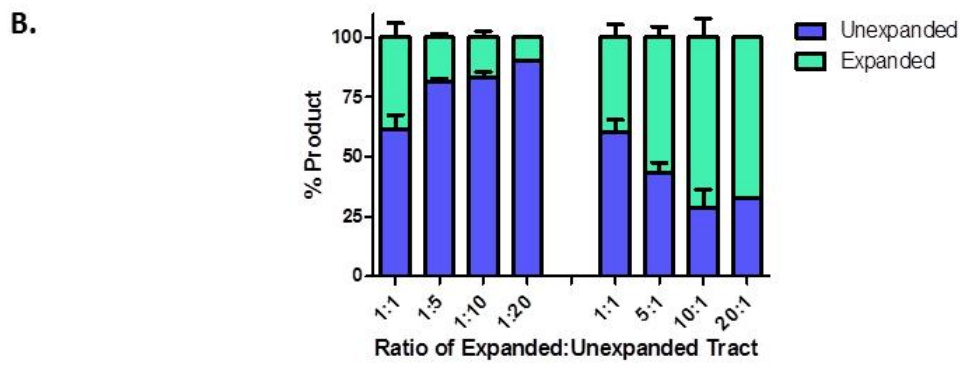

**Figure S5. PCR amplification products correlate with input template DNA.** **A.** Different ratios of unexpanded:expanded (1:1, 1:5, 1:10, 1:20) tract (genomic DNA) were used as a substrate for PCR; the total template DNA was constant at 5  $\mu$ g. The amount of input template correlates with the PCR product output, although there is a small but significant bias toward the unexpanded tract. **B.** The relative amounts of expanded and unexpanded PCR product as a function of input template ratio is plotted. The error bars indicate the S.E.M. of three independent experiments.
