# Supplementary material
Source: PubMed Central journal article supplement (PMC4512540)
Supplement: supp_115.177303_FigureS6.pdf [file supp_115.177303_FigureS6.pdf]

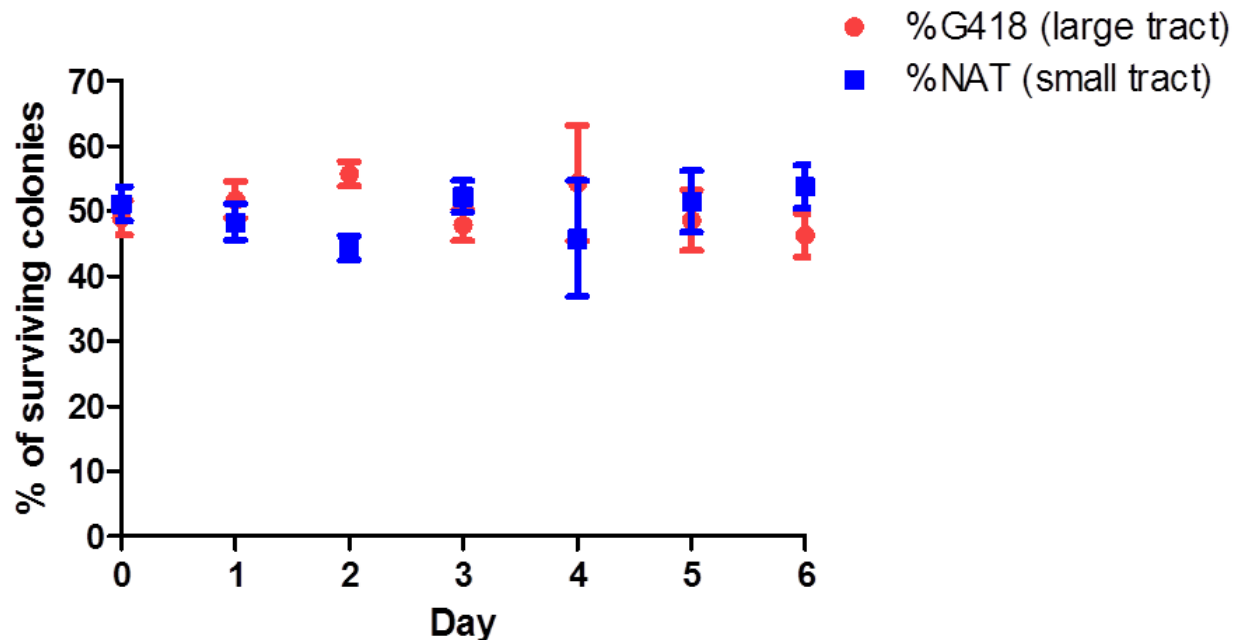

**Figure S6. A larger TNR tract does not confer a selective advantage.** A *MSH3* strain encoding a large TNR tract (>40 repeats) was transformed with a low copy plasmid encoding the KANMX cassette, conferring resistance to G418. A *MSH3* strain encoding a short (<30 repeats) TNR tract was transformed with a low copy plasmid encoding the NATMX cassette, conferring resistance to clonNAT. These cells were mixed at a 1:1 ratio and the mixture was grown as a log phase culture (see **Fig. S4A**), in the absence of selection, for 6 days. Cells were plated and the percentage that retained either the KANMX (red circles) or the NATMX (blue squares) cassette was determined. An average of three independent experiments ( $\pm$  SEM) is shown.
