# Supplementary material
Source: PubMed Central journal article supplement (PMC4512540)
Supplement: supp_115.177303_TableS1.pdf [file supp_115.177303_TableS1.pdf]

**Table S1. Background stains used to integrate TNR tracts.**

| <b>Strain No.</b> | <b>Genotype</b>                                            | <b>Derived from strain</b> | <b>Source</b>    |
|-------------------|------------------------------------------------------------|----------------------------|------------------|
| FY86              | <i>MATa ura3-52 leu2Δ1 his3Δ200</i>                        |                            | Winston, 1995    |
| JSY1501           | <i>MATa ura3-52 leu2Δ1 his3Δ200</i><br><i>msh3Δ::KANMX</i> | FY86                       | Kantartzis, 2012 |
| JSY1515           | <i>MATa ura3-52 leu2Δ1 his3Δ200 msh3Δ::hisG</i>            | FY86                       | This study       |
