# Supplementary material
Source: PubMed Central journal article supplement (PMC4512540)
Supplement: supp_115.177303_TableS2.pdf [file supp_115.177303_TableS2.pdf]

**Table S2. Initial expansion size of trinucleotide repeat tracts<sup>a</sup>**

| <b>Genotype</b>     | <b>Tract sequence</b> | <b>Median size (net change)<sup>b</sup></b> | <b>Range (net change)<sup>b</sup></b> |
|---------------------|-----------------------|---------------------------------------------|---------------------------------------|
| <i>MSH3</i> (n=61)  | <i>CAG</i>            | 42 (+17)                                    | 31-67 (+6 to +42)                     |
| <i>MSH3</i> (n=89)  | <i>CTG</i>            | 33 (+8)                                     | 26-43 (+1 to +18)                     |
| <i>msh3Δ</i> (n=38) | <i>CAG</i>            | 31 (+6)                                     | 31-48 (+6 to +16)                     |
| <i>msh3Δ</i> (n=35) | <i>CTG</i>            | 33.5 (+8)                                   | 28-39 (+3 to +14)                     |

<sup>a</sup> Initial expansion sizes obtained from all time course experiments.

<sup>b</sup> Number of repeats in TNR tract
